# Supplementary material for: Switchable catalysis and CO2 sensing by reduction resistant, luminescent copper–thiolate complexes
Source: Royal Society of Chemistry journal article supplement (doi:10.1039/d2nr05396a), 2022-01-01
Supplement: d2nr05396a1.pdf [file d2nr05396a1.pdf]

## Supporting Information

### Switchable Catalysis and CO<sub>2</sub> Sensing by Reduction Resistant, Luminescent Copper-Thiolate Complexes

Satya Ranjan Sahoo<sup>a,b</sup>, Debkumar Bera<sup>a,b</sup>, Sumit Saha<sup>a,b</sup> and Nirmal Goswami<sup>a,b\*</sup>

<sup>a</sup>Materials Chemistry Department, CSIR-Institute of Minerals & Materials Technology, Bhubaneswar, Odisha 751013, India.

<sup>b</sup>Academy of Scientific and Innovative Research (AcSIR), Ghaziabad, Uttar Pradesh, 201002, India.

Corresponding Author's Email: [ngoswami@immt.res.in](mailto:ngoswami@immt.res.in)

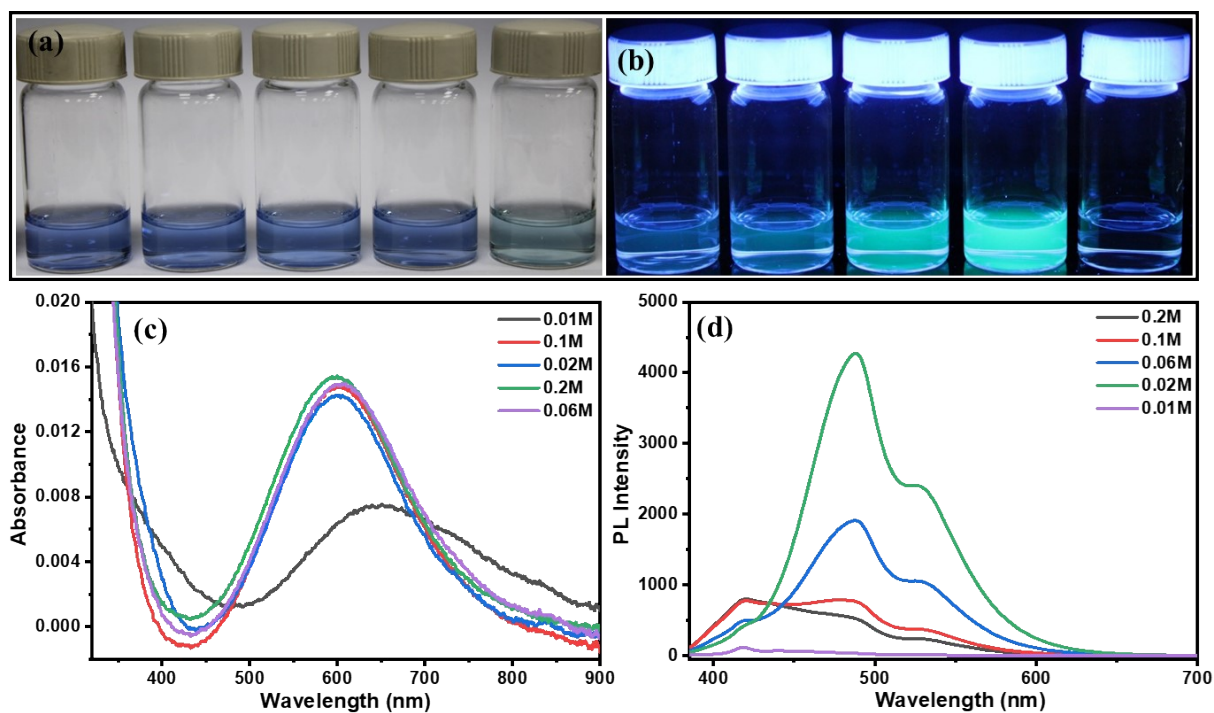

**Fig. S1** Photographs of the copper-thiolate complexes under (a) visible and (b) UV light. These complexes were synthesized at different concentrations of NaOH between 0.2M to 0.01M (from left to right). (c) UV-Vis and (d) PL spectra of the copper-thiolate complexes were synthesized at different concentrations of NaOH.

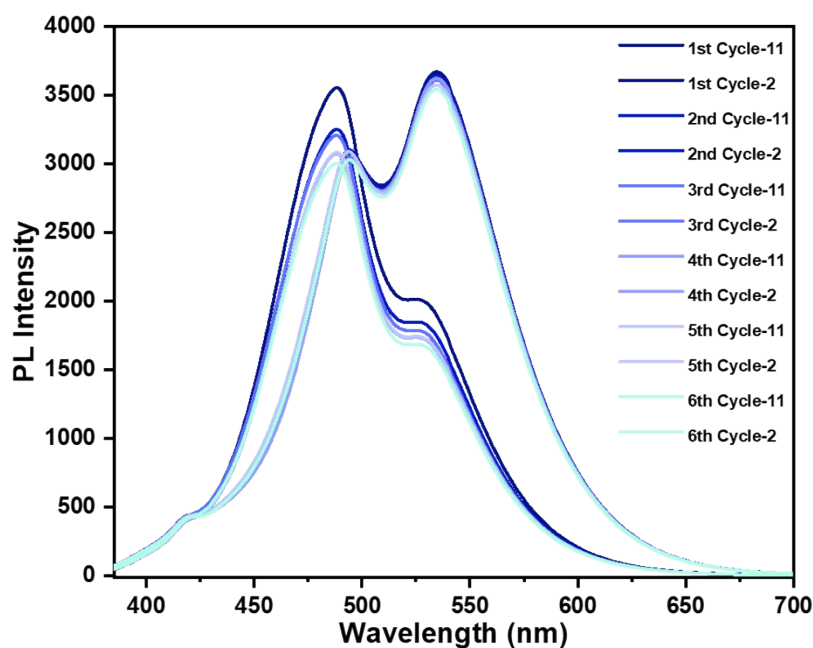

**Fig. S2** PL spectra of the Complex upon switching (6 cycles).

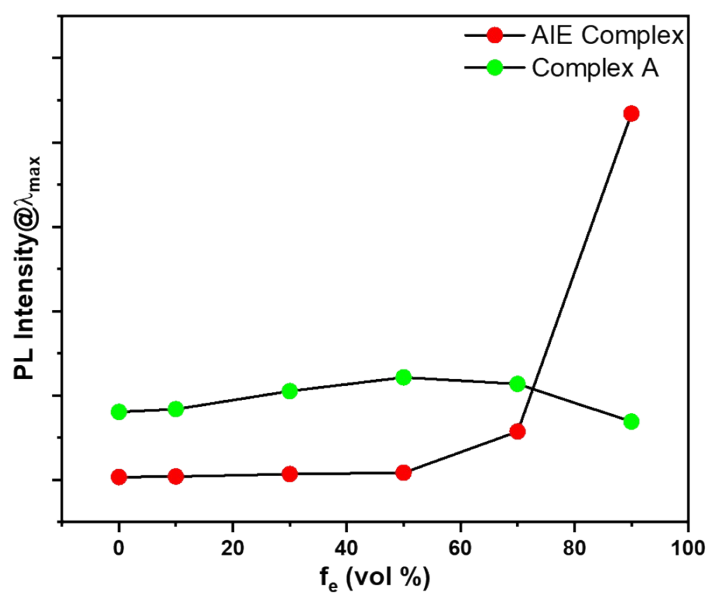

**Fig. S3** Relationship between the PL intensity at  $\lambda_{\max}$  and  $f_e$  (vol.%) [ $f_e = \text{vol}_{\text{ethanol}} / (\text{vol}_{\text{ethanol}} + \text{vol}_{\text{water}})$ ] for **Complex A** ( $\lambda_{\max} = 535$  nm) and AIE type Cu-thiolate (GSH) complex ( $\lambda_{\max} = 603$  nm). These AIE-type Cu-thiolate complexes were prepared by dropwise addition of 5 mL  $\text{CuSO}_4$  (10mM) into 5 mL GSH (50 mM) at room temperature under stirring followed by adjusting the pH to 6 by adding NaOH solution (1 M).

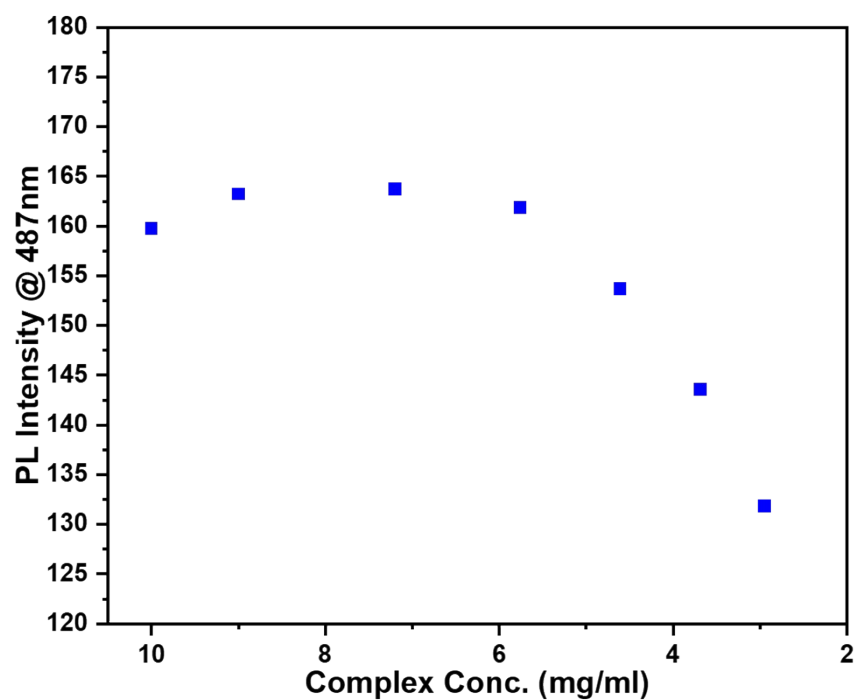

**Fig. S4** Concentration dependent PL intensity of **Complex B** monitored at 487 nm.

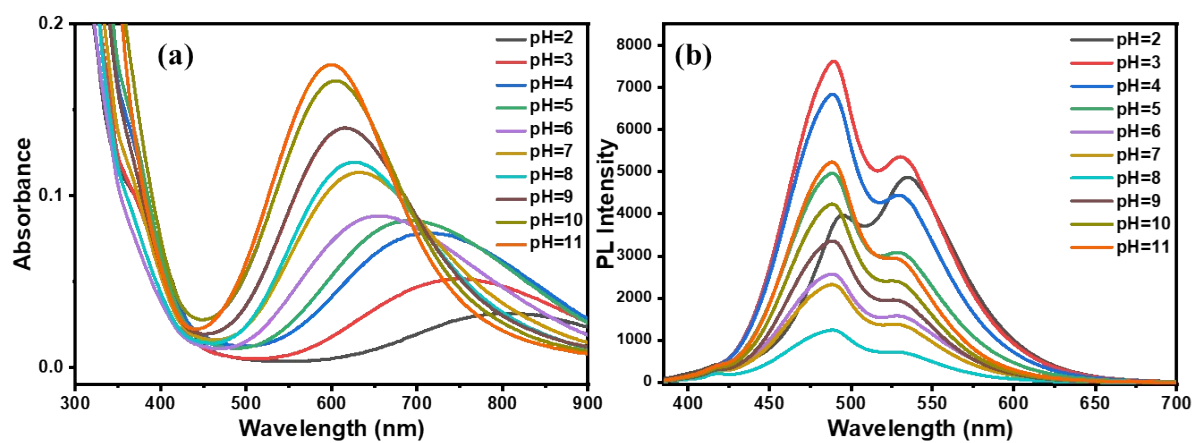

**Fig. S5 (a)** UV-Vis absorbance spectra and **(b)** PL spectra of the Complex A after changing its pH from 2 to 11.

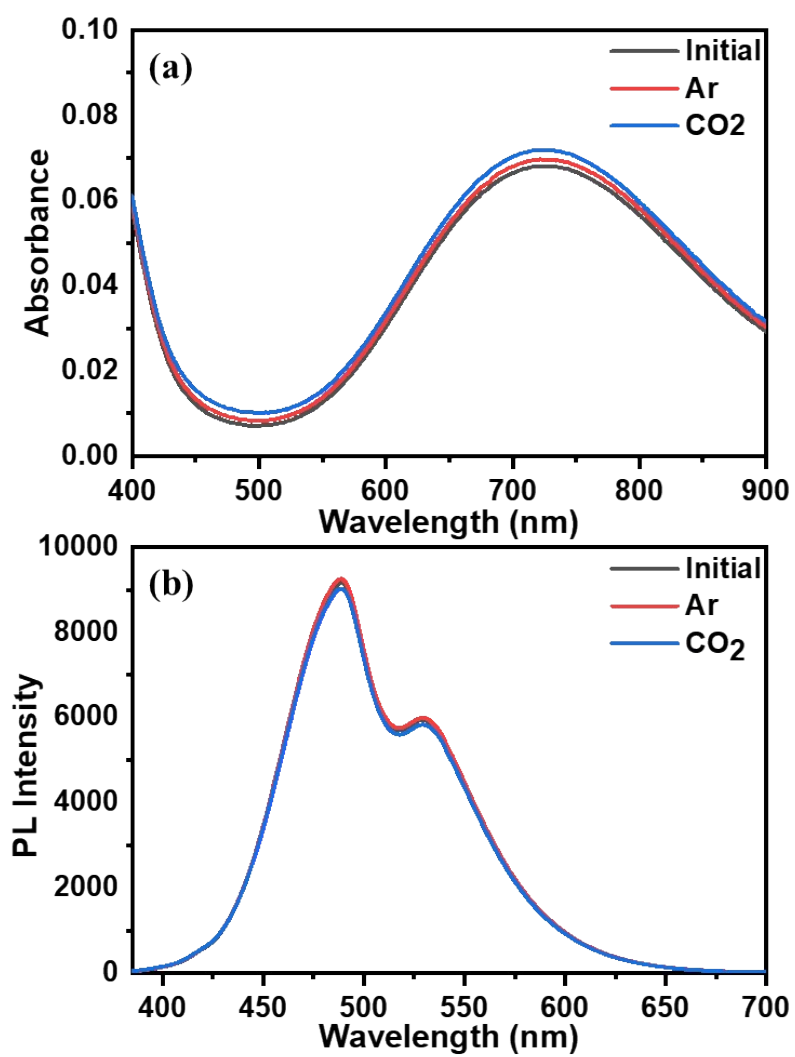

**Fig. S6 (a)** UV-Vis absorbance and **(b)** PL spectra of Complex B at pH = 4 after purging with Argon and CO<sub>2</sub> gas.

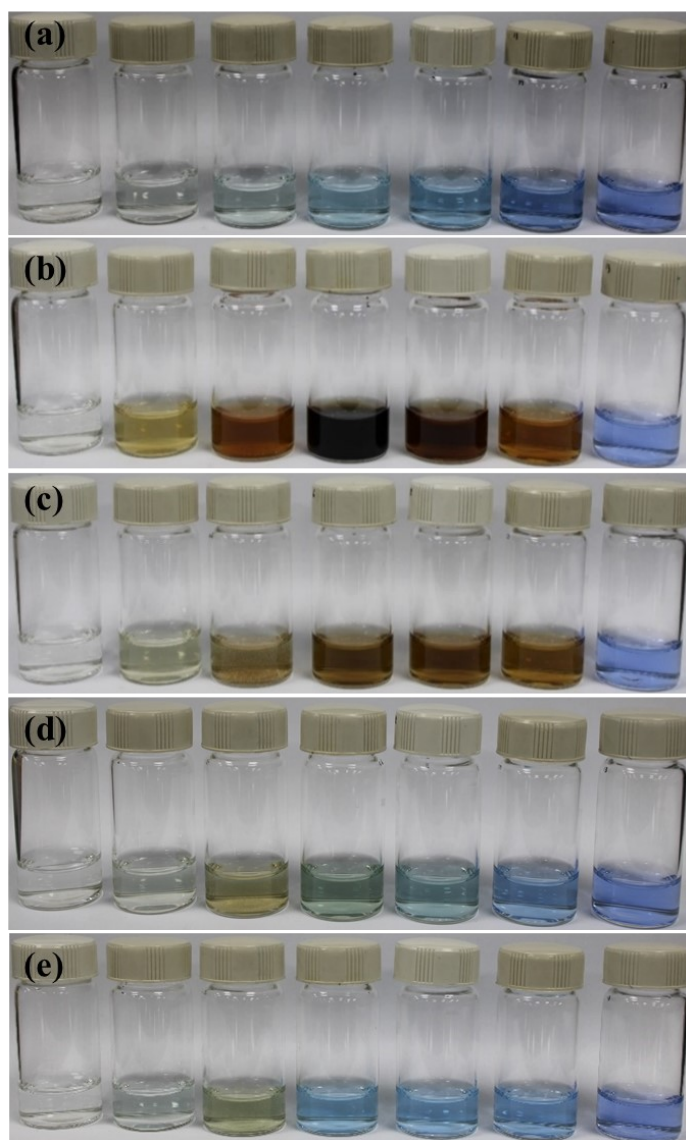

**Fig. S7** Photographs of the Complex at different pH (=2,3,4,6,8,10 & 11 from left to right) **(a)** without  $\text{NaBH}_4$  and after incubating it with  $30\mu\text{L}$  of  $100\text{mM}$   $\text{NaBH}_4$  solution with incubation time, **(b)** 15min, **(c)** 1hr, **(d)** 10hr, and **(e)** 24hr.

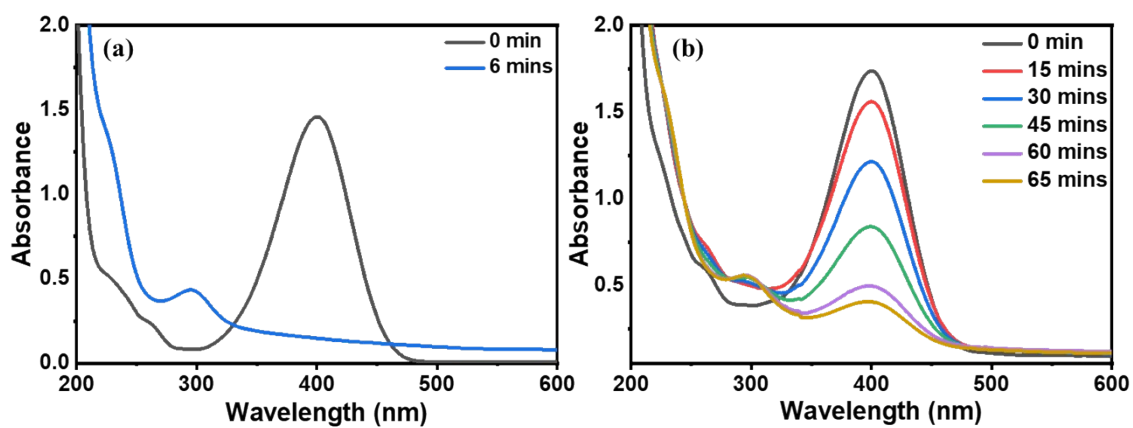

**Fig. S8** UV-Vis absorbance spectra showing the time-dependent 4-NP reduction by (a) **Complex A** and (b) **Complex B** after 1<sup>st</sup> cycle of switching.

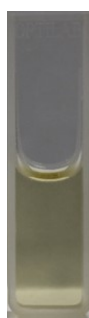

**Fig. S9** Photograph of **Complex B** after adding  $\text{H}_2\text{O}_2$ .

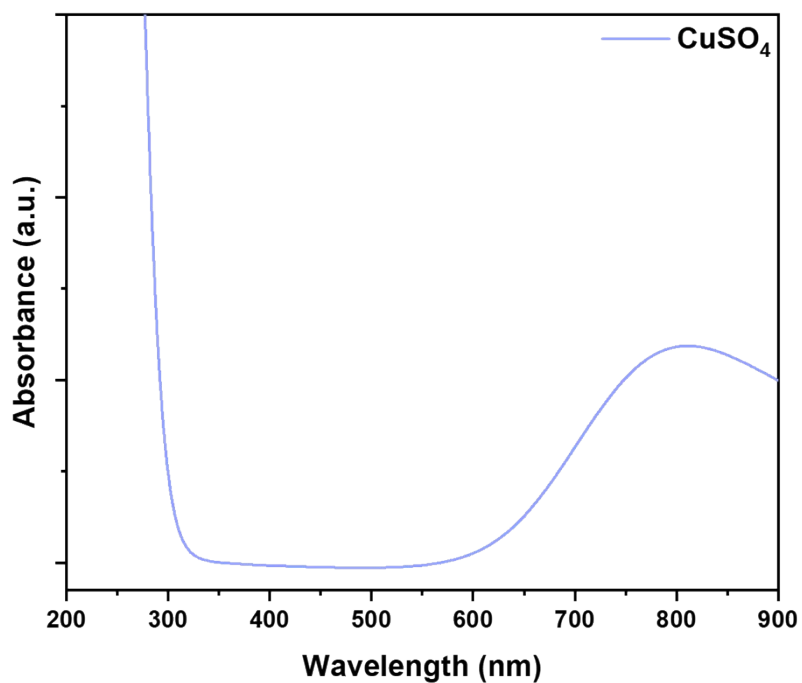

**Fig. S10** UV-Vis absorbance spectra of the aqueous solution of  $\text{CuSO}_4$ .
